# Supplementary material for: How important is thermodynamics for identifying elementary flux modes?
Source: PubMed Central journal article supplement (PMC5319754; doi:10.1371/journal.pone.0171440), 2017-02-21
Supplement: pone.0171440.s001.pdf [file pone.0171440.s001.pdf]

# Thermodynamical EFMs (tEFMs) of the monosaccharide metabolism

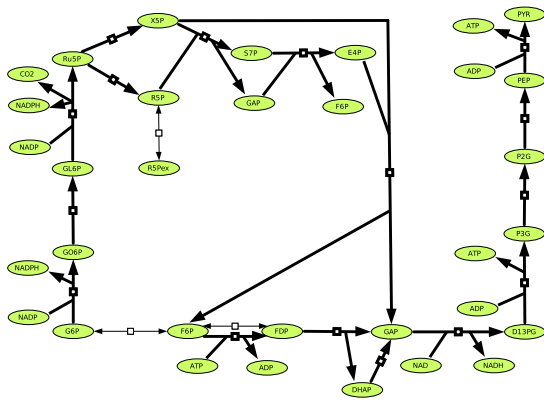

1 - tEFM 1

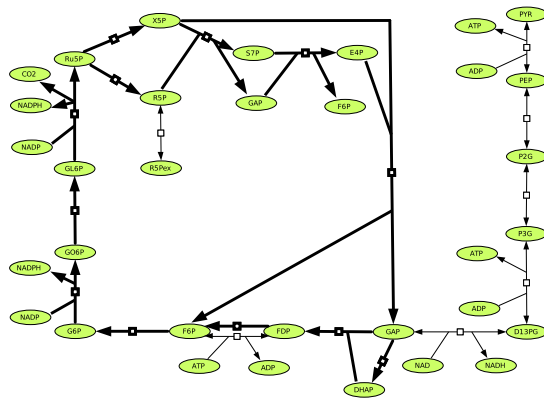

2 - tEFM 2

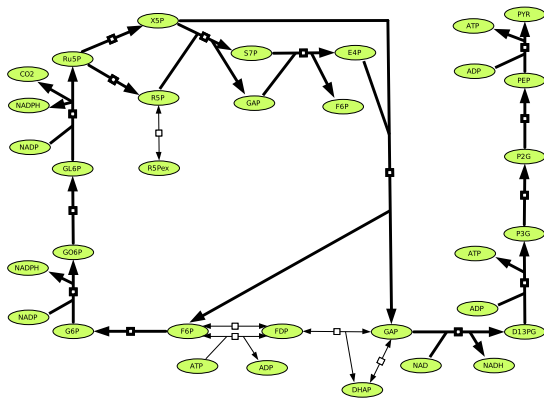

3 - tEFM 3

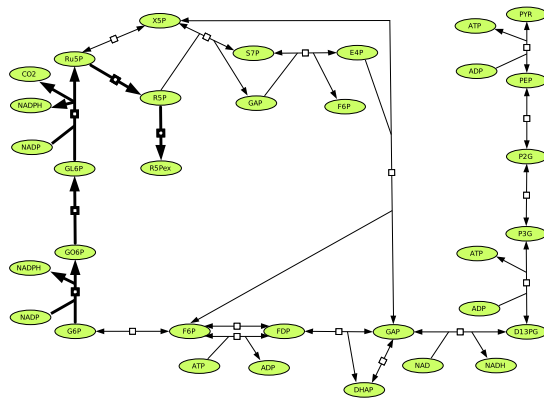

4 - tEFM 4

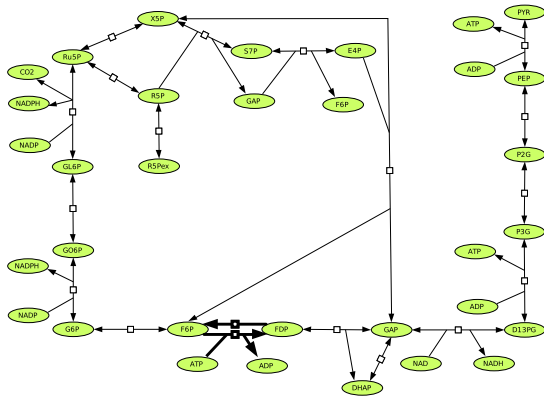

5 - tEFM 5

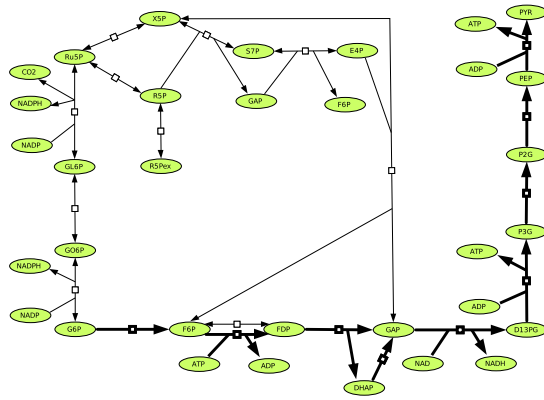

6 - tEFM 6

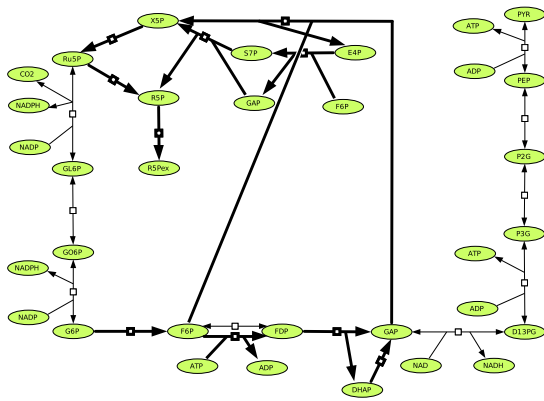

7 - tEFM 7

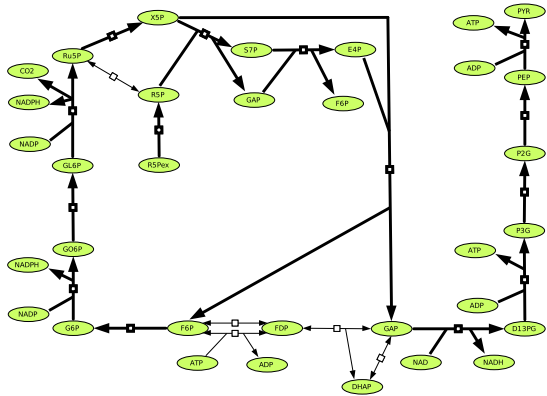

8 - tEFM 8

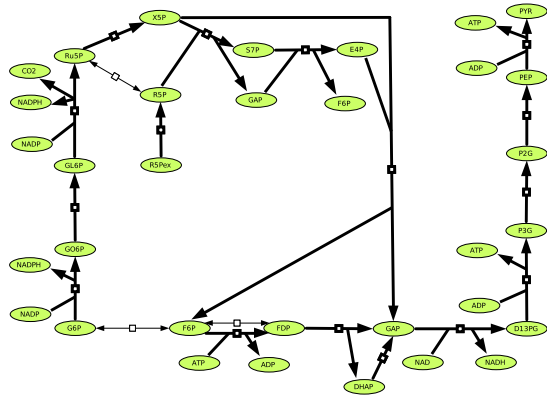

9 - tEFM 9

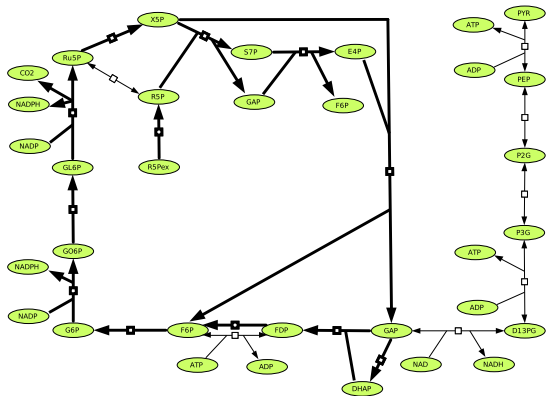

10 - tEFM 10

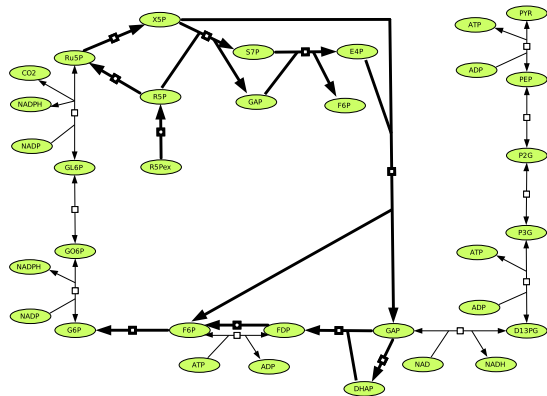

11 - tEFM 11

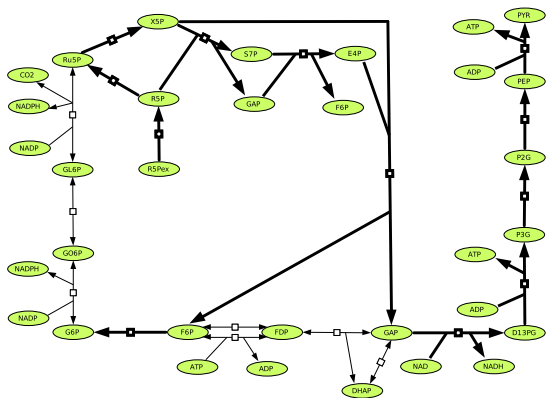

12 - tEFM 12

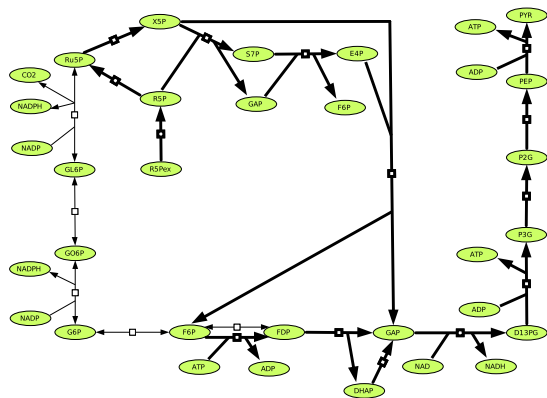

13 - tEFM 13

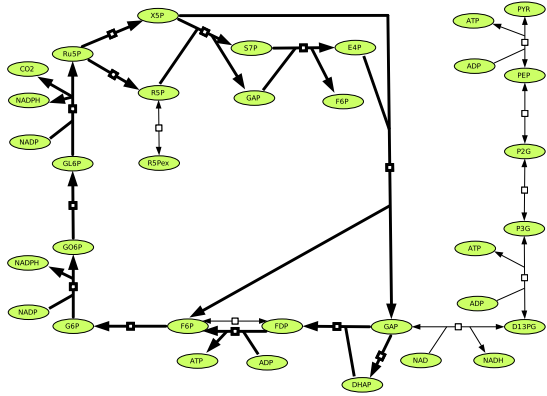

14 - tEFM 14

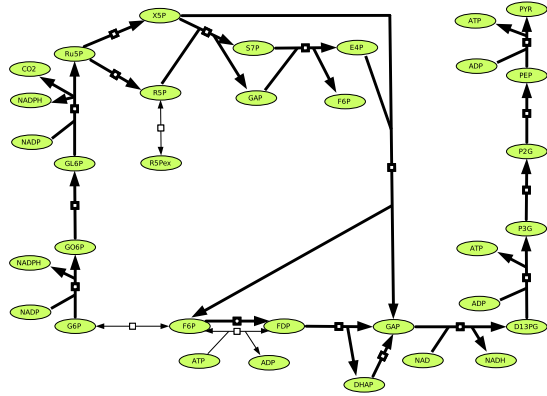

15 - tEFM 15

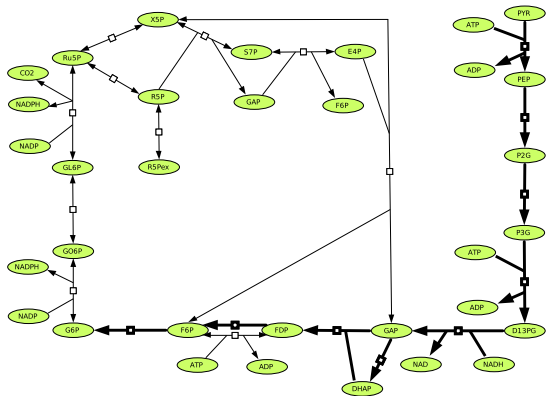

16 - tEFM 16

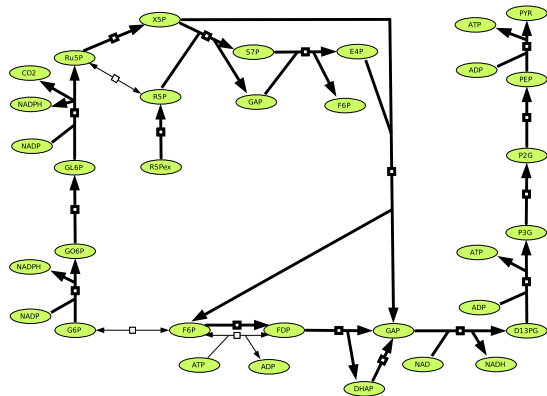

17 - tEFM 17

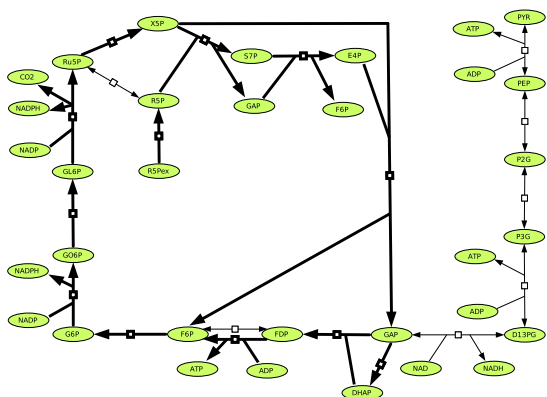

18 - tEFM 18

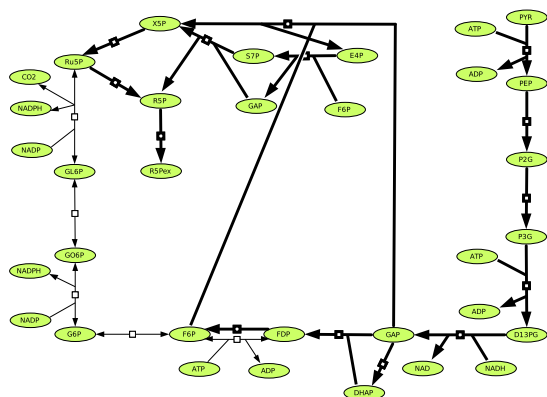

19 - tEFM 19
